# Supplementary material for: Domains and Categories of Needs in Long-term Follow-up of Adult Cancer Survivors: A Scoping Review of Systematic Reviews
Source: Preprints.org preprint supplement (doi:10.20944/preprints202404.0175.v1), 2024-04-02
Supplement: Supplementary file 1 [file supplementary]

*Scoping review of systematic reviews*

**Domains and Categories of Needs in Long-term Follow-up of Adult Cancer Survivors: A Scoping Review of Systematic Reviews.**

**Nicolas Sperisen12*, Dimitri Kohler2, Nicole Steck2, Pierre-Yves Dietrich34, Elisabetta Rapiti5**

1 Institute of Global Health, Faculty of Medicine, University of Geneva, 1205 Geneva, Switzerland

2 Swiss Cancer League, 3001 Bern, Switzerland

3 Clinique des Grangettes, Hirslanden, 1224 Geneva, Switzerland

4 Faculty of Medicine, Univerity of Geneva, 1205 Geneva, Switzerland

5 Geneva Cancer Registry, Institute of Global Health, Faculty of Medicine, University of Geneva, 1205 Geneva, Switzerland

***** Correspondence: [nicolas.sperisen@krebsliga.ch](mailto:nicolas.sperisen@krebsliga.ch); Tel.: +41 31 389 92 90

**List of search terms**

**Research questions**

- What are the needs in long-term follow-up of cancer survivors?
- Are there socio-demographic differences in the needs (e.g. age, gender, marital status, income, location, etc.)?
- Are the needs greater in the transition phase (directly after acute treatments)?

|  | **Concept 1** | **Concept 2** | **Concept 3** |
| --- | --- | --- | --- |
| **Concept** | **Needs** | **Follow-up** | **Cancer survivors** |
| **MESH (pubmed)** | ***And***  **Needs assessment** **[Mesh]**  **Health Services Needs and Demand** **[Mesh]**  *Health Services Needs*  *needs* | ***And***  **Aftercare[Mesh:** **NoExp]**  *After Care*  *After-Treatment*  **Continuity of Patient Care"[Mesh:NoExp])**  **"Transitional Care"[Mesh]** | ***And***  **"Cancer Survivors"[Mesh]**  **(Exclude children, adolescents and adults diagnosed with cancer before the age of 18)** |
| **EMTREE (Embase)** | 'needs'/exp  'human needs'/exp  'unmet needs'/exp  'health care need'/de  'supportive care need'/exp 'unmet medical need'/exp  'long term care'/exp | 'aftercare'/exp  'patient care'/de  'case management'/exp  'patient care planning'/exp  'patient decision making'/exp  'patient monitoring'/de  'monitoring'/de  'questionnaire'/de  'navigation'/exp  'care coordination'/exp | 'cancer survival'/de  'cancer survivor'/exp |
| **APA THESAURUS** | Psychological needs  Health service needs  Needs assessment | Aftercare  Posttreatment followup  Case management  Long term care  Interpersonal interaction | Neoplasm |
| **Free vocabulary**  **Synonyms**  **Related terms** | Needs Assessments  Unmet needs  Supportive care needs  Long-term care needs  Care process needs  Assessment of Healthcare  Needs and Demand  Health Services Needs  Services needs  Information needs | Follow-up  Followup  Monitoring  Survey and questionnaires  Surveillance  Case management  Navigation  After treatment  Aftertreatment  Communication  Coordination  Aftercare  After care  Continuity of patient care  Patient report | Cancer survivors  Cancer survivorship |
